# Supplementary material for: The quaternary architecture of RARβ–RXRα heterodimer facilitates domain–domain signal transmission
Source: PubMed Central journal article supplement (PMC5636793; doi:10.1038/s41467-017-00981-y), 2017-10-11
Supplement: 41467_2017_981_MOESM1_ESM.pdf [file 41467_2017_981_MOESM1_ESM.pdf]

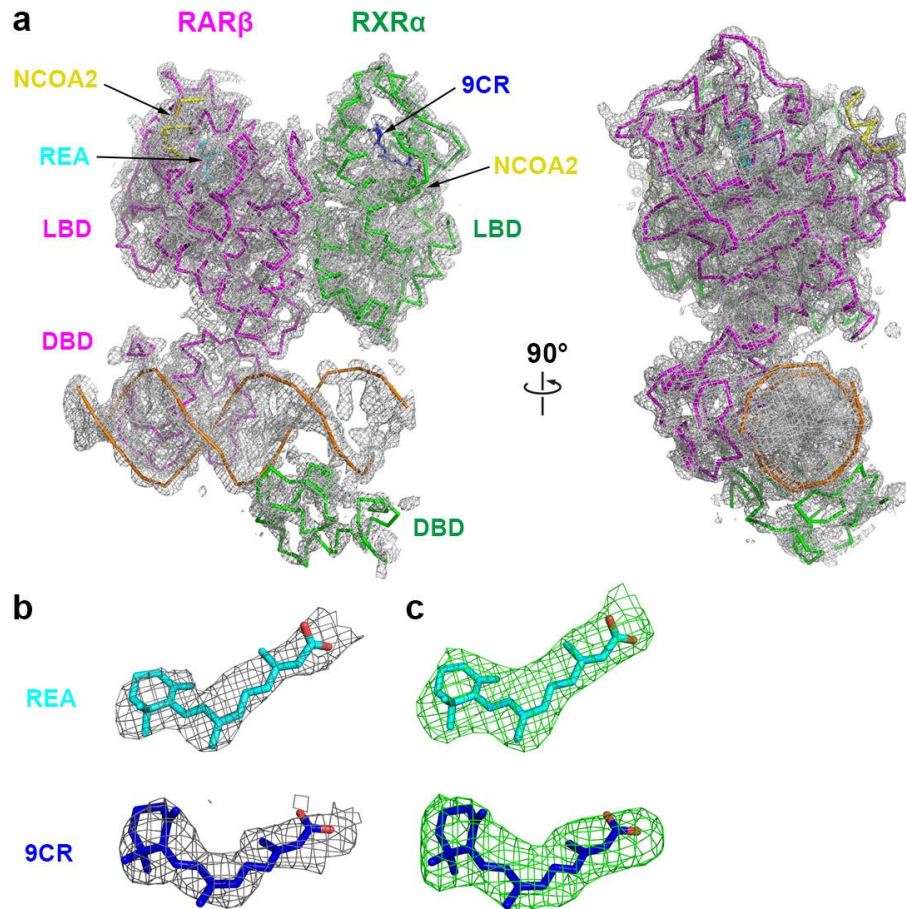

**Supplementary Figure 1 Electron density maps of the RAR $\beta$ -RXR $\alpha$ -DNA complex.** (a)  $2F_o - F_c$  map contoured at  $1.0\sigma$  covers the overall RAR $\beta$ -RXR $\alpha$ -DNA complex in two views. The colors used for RAR $\beta$ , RXR $\alpha$ , DNA, NCOA2 peptides, REA, 9CR and density are magenta, green, orange, yellow, cyan, blue and gray, respectively. (b and c) The  $2F_o - F_c$  maps at  $1.0\sigma$  (b) and polder OMIT maps at  $3.0\sigma$  (c) of two ligands REA and 9CR are shown in gray and green colors, respectively.

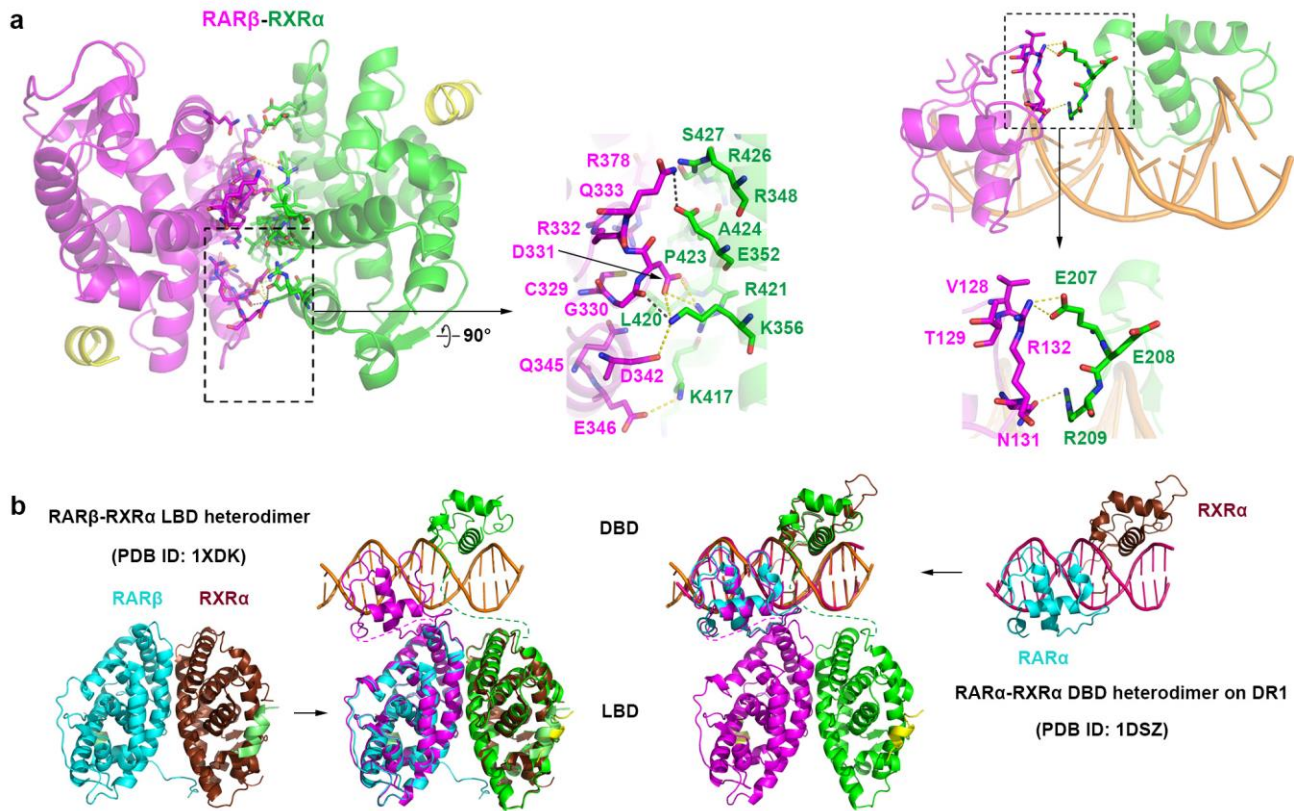

**Supplementary Figure 2 Dimerization of the multi-domain RAR $\beta$ -RXR $\alpha$  complex.** (a) The dimerization interfaces between two LBDs (left) and two DBDs (right), with enlarged views showing representative details of the interactions. These interfaces are mainly mediated by salt bridges (yellow dotted lines), hydrogen bonds (gray dotted lines) and hydrophobic interactions. (b) Comparison between multi-domain RAR $\beta$ -RXR $\alpha$  complex and isolated DBD or LBD heterodimers. Structure superimpositions of RAR $\beta$ -RXR $\alpha$ -DNA complex with previously published RAR $\beta$ -RXR $\alpha$  LBD heterodimer (left) and RAR $\alpha$ -RXR $\alpha$  DBD heterodimer on DR1 DNA (right).

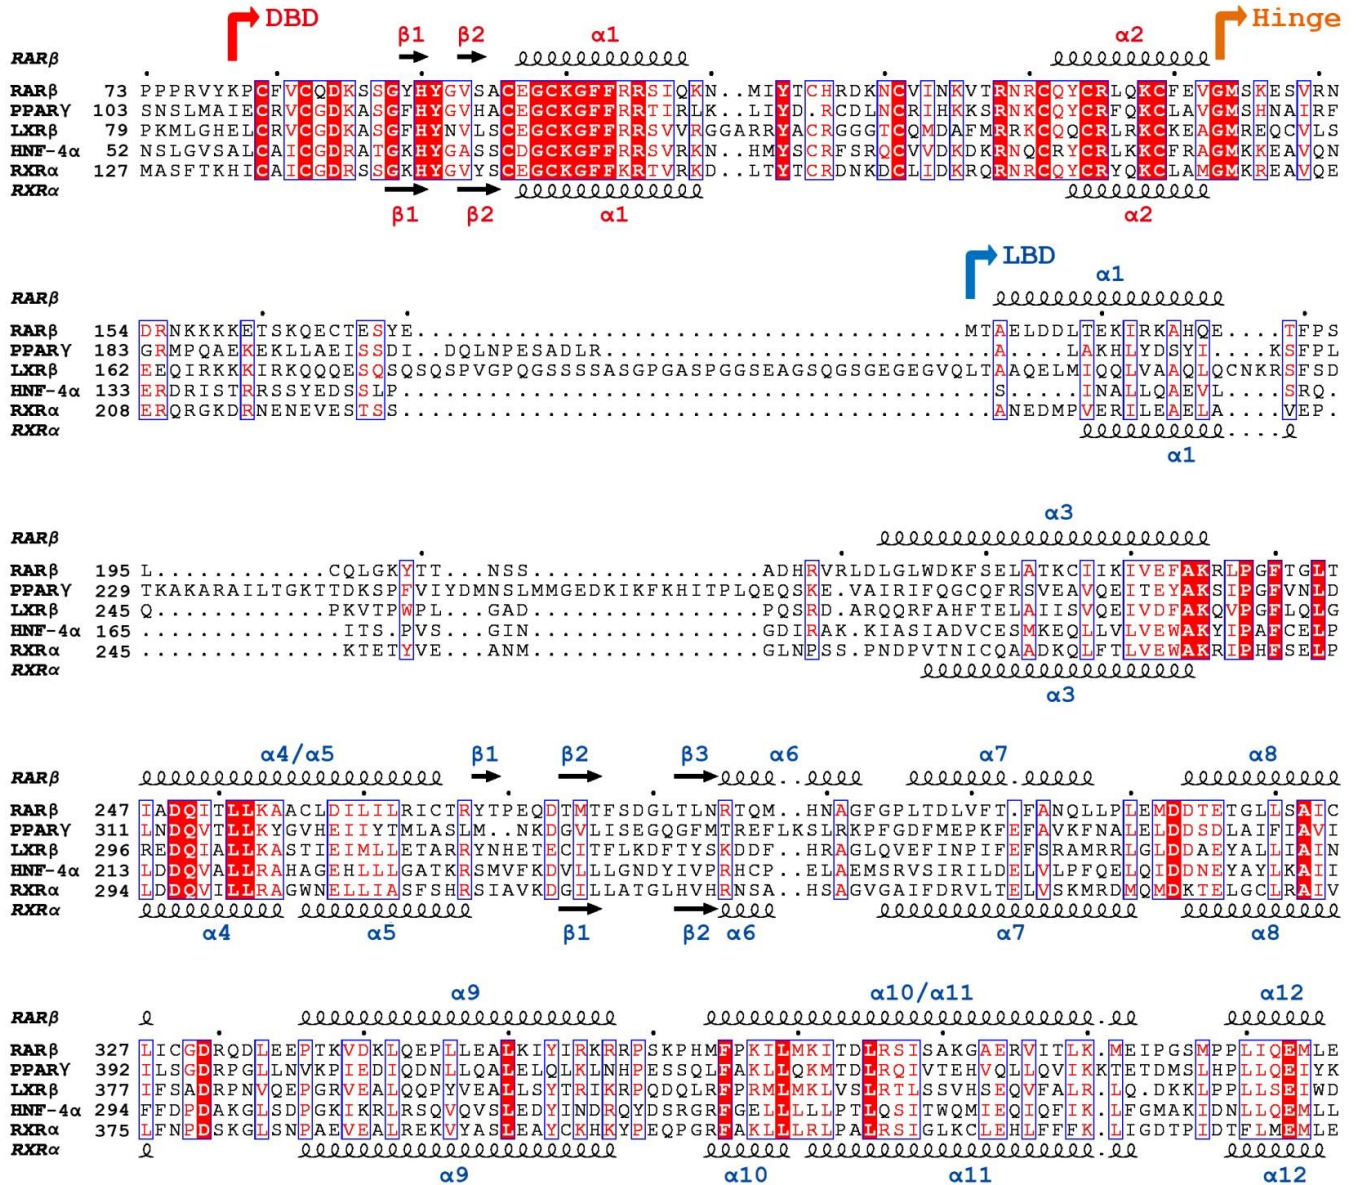

**Supplementary Figure 3 Structure-based sequence alignment of human RARβ, PPARγ, LXRβ, HNF-4α and RXRα proteins.** The starting positions of DBD, hinge and LBD segments are labelled in red, orange and blue, respectively. The secondary structure components of RARβ are shown above the alignment, while those of RXRα shown below.



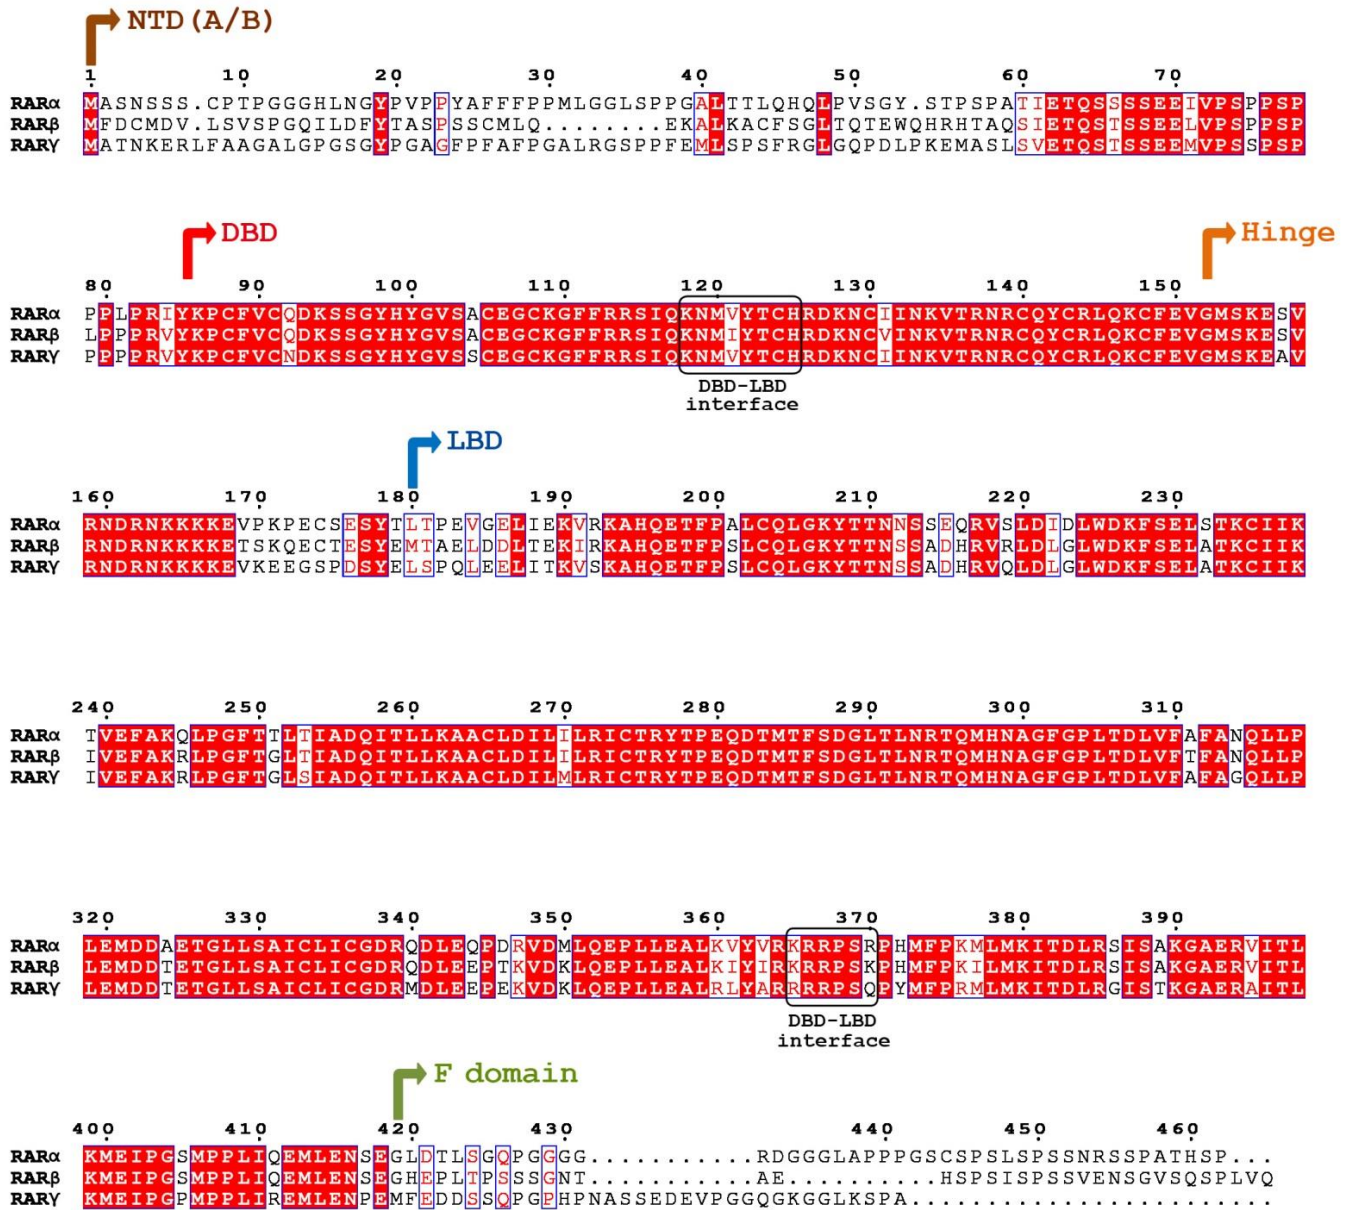

**Supplementary Figure 4** Sequence alignment of human full-length RAR $\alpha$ , RAR $\beta$  and RAR $\gamma$  proteins. The starting positions of NTD (A/B domain), DBD, hinge, LBD and F domain segments are labelled in brown, red, orange, blue and green, respectively. The regions involved in DBD-LBD interface are also indicated by black boxes.

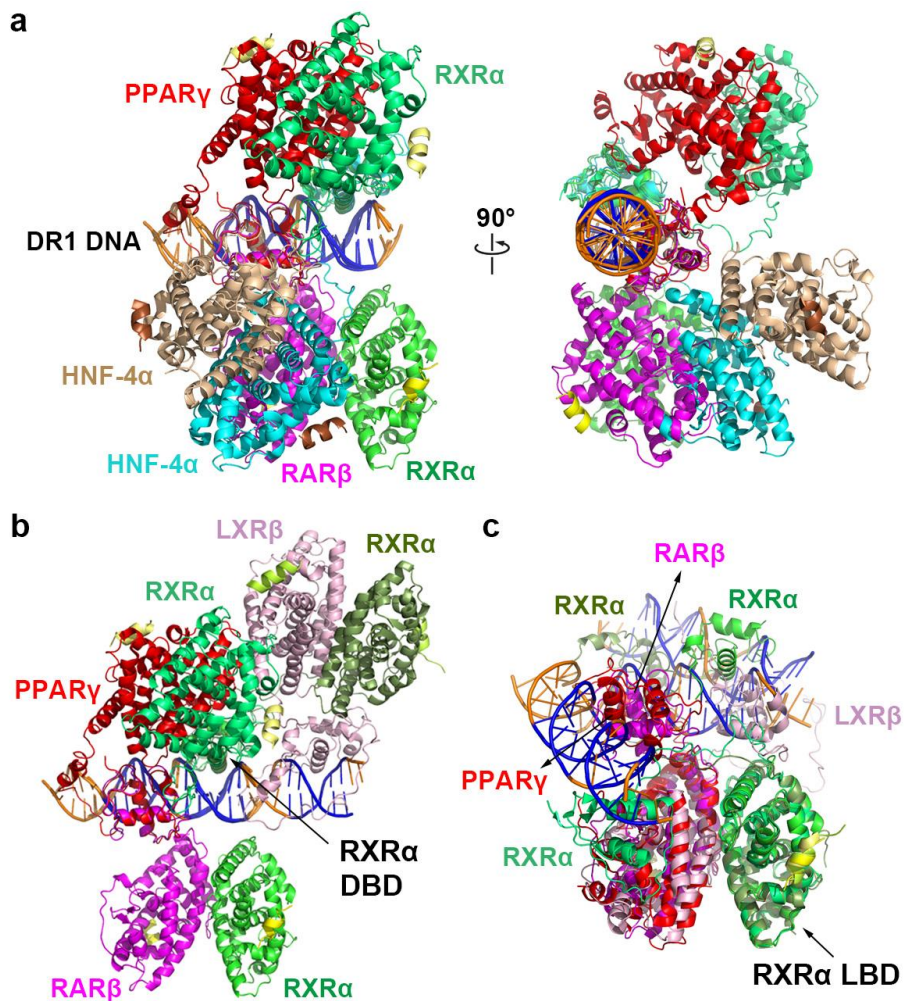

**Supplementary Figure 5 Superimpositions of multi-domain NR crystal structures. (a)** Superposed RAR $\beta$ -RXR $\alpha$  heterodimer, PPAR $\gamma$ -RXR $\alpha$  heterodimer and HNF-4 $\alpha$  homodimer structures by aligning the DR1 DNA sequences in two views. **(b and c)** Superposition of RAR $\beta$ -RXR $\alpha$ , PPAR $\gamma$ -RXR $\alpha$  and LXR $\beta$ -RXR $\alpha$  structures, by aligning the common partner RXR $\alpha$ 's DBD **(b)** or LBD **(c)**, respectively.

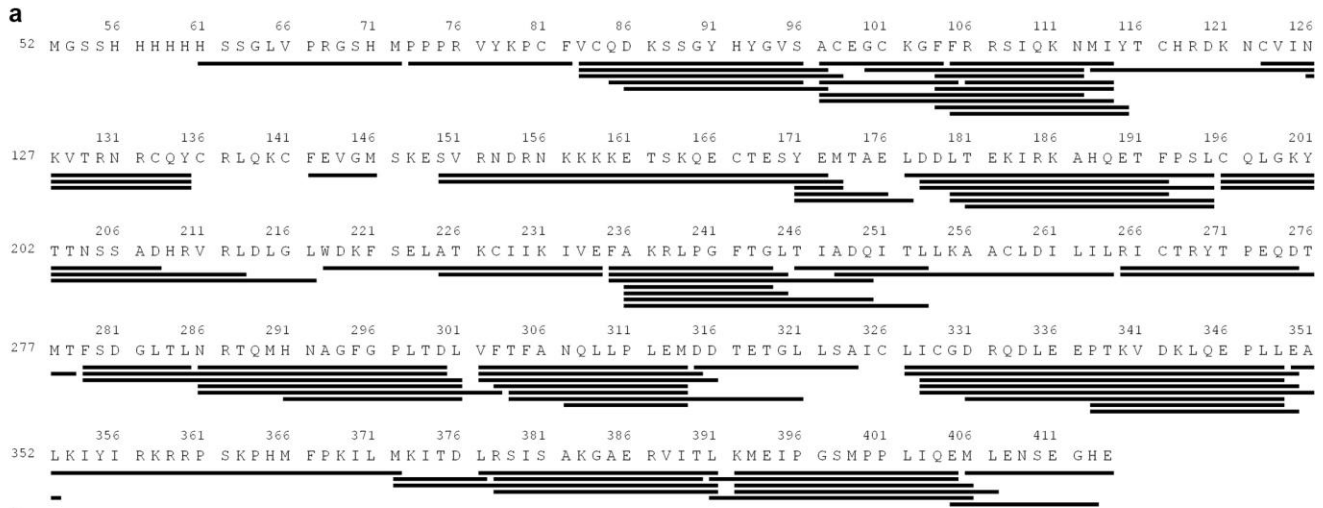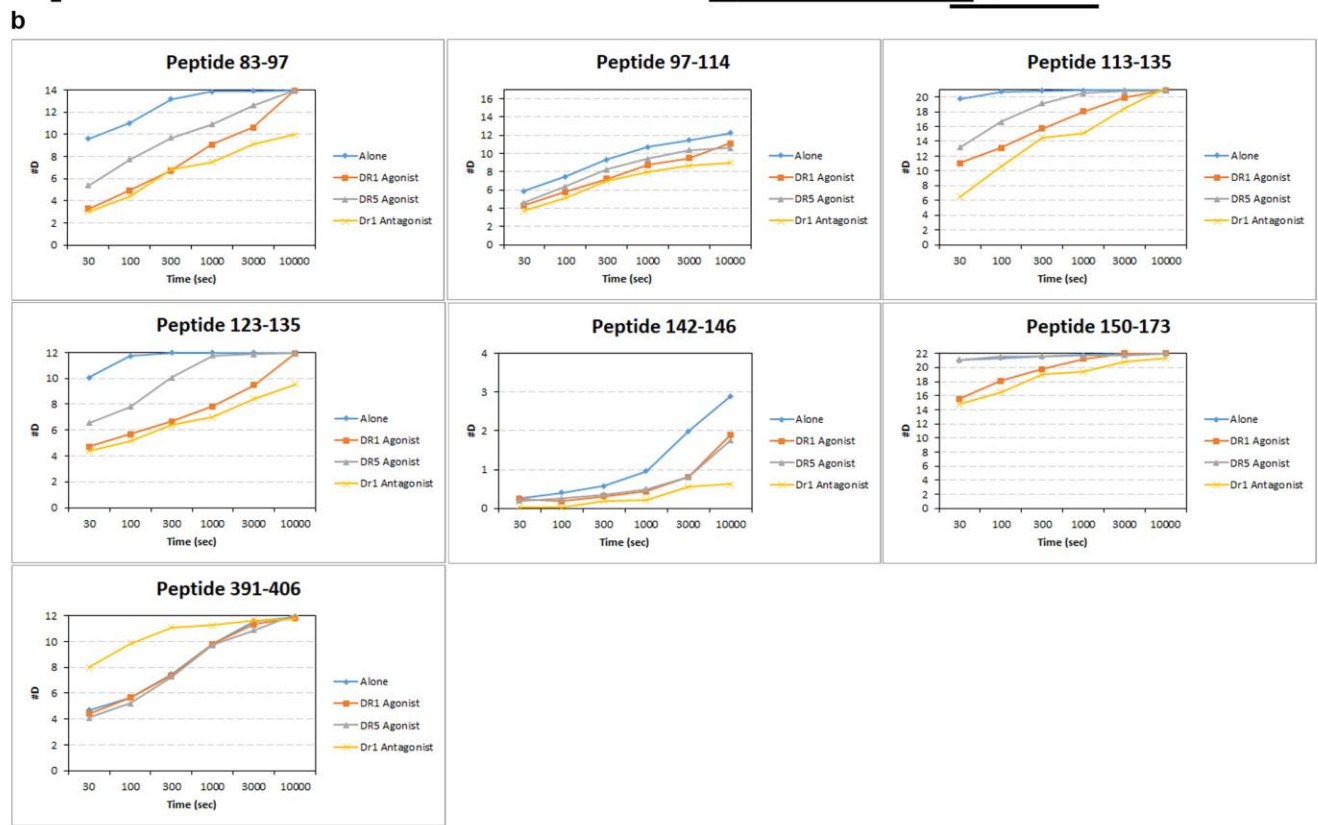

Supplementary Figure 6 Peptide coverage map for RAR $\beta$  in the HDXMS studies (a) and individual uptake curves for selected regions (b).

**Supplementary Table 1 Sequences of the primers used in this study.**

|                                                |         |                                              |
|------------------------------------------------|---------|----------------------------------------------|
| RXR $\alpha$ cloning primers                   | Forward | AAAAAACATATGAACCCCGTCAGCAGC                  |
|                                                | Reverse | AAAAAACTCGAGCTAAGTCATTTGGTGCGG               |
| RAR $\beta$ cloning primers                    | Forward | AAAAAAGCTAGCATGCCTCCCCCTCGAGTGTAC            |
|                                                | Reverse | AAAAAAGCGGCCGCTCATTCATGTCCTTCAGAATTCTC       |
| RAR $\beta$ E99A mutation primers              | Forward | GGGGTCAGCGCCTGTGCTGGATGTAAGGGCTTTTTC         |
|                                                | Reverse | GAAAAAGCCCTTACATCCAGCACAGGCGCTGACCCC         |
| RAR $\beta$ R106A mutation primers             | Forward | TGTAAGGGCTTTTTCGCTAGAAGTATTCAGAAG            |
|                                                | Reverse | CTTCTGAATACTTCTAGCGAAAAAGCCCTTACA            |
| RAR $\beta$ M113E mutation primers             | Forward | AGAAGTATTCAGAAGAATGAAATTTACACTTGTCCCGA       |
|                                                | Reverse | TCGGTGACAAGGTGAAATTTCACTTCTGAATACTTCT        |
| RAR $\beta$ T116V mutation primers             | Forward | CAGAAGAATATGATTTACGTCTGTCACCGAGATAAG         |
|                                                | Reverse | CTTATCTCGGTGACAGACGTAAATCATATTCTTCTG         |
| RAR $\beta$ K358E mutation primers             | Forward | CTAAAAATTTATATCAGAGAAAGACGACCCAGCAAGCCT      |
|                                                | Reverse | AGGCTTGCTGGGTCGTCTTTCTCTGATATAAATTTTAG       |
| RAR $\beta$ R359E mutation primers             | Forward | AAAATTTATATCAGAAAAGAACGACCCAGCAAGCCTCAC      |
|                                                | Reverse | GTGAGGCTTGCTGGGTCGTTCTTTTCTGATATAAATTTT      |
| RAR $\beta$ R360E mutation primers             | Forward | ATTTATATCAGAAAAGAGAACCAGCAAGCCTCACATG        |
|                                                | Reverse | CATGTGAGGCTTGCTGGGTTCTCTTTTCTGATATAAAT       |
| RAR $\beta$ K358E/R359E/R360E mutation primers | Forward | CTAAAAATTTATATCAGAGAAGAAGAACCAGCAAGCCTCACATG |
|                                                | Reverse | CATGTGAGGCTTGCTGGGTTCTCTTCTCTGATATAAATTTTAG  |
| RAR $\beta$ S363E/K363E mutation primers       | Forward | AGAAAAAGACGACCCGAAGAACCTCACATGTTTCAAAG       |
|                                                | Reverse | CTTTGAAACATGTGAGGTTCTTCGGGTCGTCTTTTCT        |
